# Supplementary material for: Blood metal levels and serum testosterone concentrations in male and female children and adolescents: NHANES 2011–2012
Source: PLoS One. 2019 Nov 7;14(11):e0224892. doi: 10.1371/journal.pone.0224892 (PMC6837506; doi:10.1371/journal.pone.0224892)
Supplement: S1 File — (XLS) [file pone.0224892.s001.xls]

## Sheet: name
Variable name	Value description	Variable notes
SEQN		Respondent sequence number
WTINT2YR		Full Sample 2 Year Interview Weight
WTMEC2YR		Full Sample 2 Year MEC Exam Weight
INDFMPIR		Poverty income ratio (PIR)
RIDEXMON		Six month time period
	1	November 1 through April 30
	2	May 1 through October 31
RIDEXAGY		Age in years at exam - 2 to 19 years
SDMVPSU		Masked variance pseudo-PSU
SDMVSTRA		Masked variance pseudo-stratum
WTSA2YR		Subsample A weights
DR1ICAFF		Caffeine (mg)
DR2ICAFF		Caffeine (mg)
RIAGENDR		Gender
	1	Male
	2	Female
RIDAGEYR		Age (years)
RIDRETH1		Race/Ethnicity - Recode
	1	Mexican American
	2	Other Hispanic
	3	Non-Hispanic White
	4	Non-Hispanic Black
	5	Other Race - Including Multi-Racial
PHDSESN		Session in which SP was examined
	0	morning
	1	afternoon
	2	evening
DMDEDUC		Education
	1	Less Than High School
	2	High School
	3	More Than High School
	7	Refused
	9	Don't know
SMQ040		Do you now smoke cigarettes
	1	Every day
	2	Some days
	3	Not at all
	7	Refused
	9	Don't know
SMQ020		Smoked at least 100 cigarettes in life
	1	Yes
	2	No
	7	Refused
	9	Don't know
ALQ101		Had at least 12 alcohol drinks/1 yr?
	1	Yes
	2	No
	7	Refused
	9	Don't know
PADDURAT		Average duration of activity (minutes)
DIQ010		Doctor told you have diabetes
	1	yes
	2	no
	3	borderline
MCQ160I		Ever told you had thyroid disease
	1	Yes
	2	No
	7	Refused
	9	Don't know
MCQ170I		Do you still have thyroid disease
	1	Yes
	2	No
	7	Refused
	9	Don't know
MCQ240U		Age prostate cancer first diagnosed
MCQ240AA		Age testicular cancer first diagnosed
MCQ240BB		Age when thyroid cancer first diagnosed
PAQ180		Avg level of physical activity each day
	1	mainly sit
	2	walk a lot
	3	carry light louds
	4	carry heavy louds
	7	Refused
	9	Don't know
DRXTKCAL		Energy (kcal)
DRXTPROT		Protein (gm)
DRXTCARB		Carbohydrate (gm)
DRXTSUGR		Total sugars (gm)
DRXTTFAT		Total fat (gm)
DRXTSFAT		Total saturated fatty acids (gm)
DRXTPFAT		Total polyunsaturated fatty acids (gm)
DRXTMFAT		Total monounsaturated fatty acids (gm)
DRXTIRON		Iron (mg)
DRXTCHOL		Cholesterol (mg)
DRXTP205		PFA 20:5 (Eicosapentaenoic) (gm)
DRXTP226		PFA 22:6 (Docosahexaenoic) (gm)
DRXTALCO		Alcohol (gm)
DRXTCALC		Calcium (mg)
DBD196		Past 30 day milk product consumption
	0	Never
	1	rarely
	2	once a week or more
	3	once a day
	4	Varied
	7	Refused
	9	Don't know
BMXBMI		Body Mass Index (kg/m**2)
BMDBMIC		BMI Category - Children/Adolescents
	1	Underweight
	2	Normal weight
	3	Overweight
	4	Obese
BMXWAIST		Waist Circumference (cm)
BPXSAR		SBP average reported to examinee
BPXDAR		DBP average reported to examinee
DXDTOPF		Total Percent Fat
LBXBPB		Blood Lead (ug/dL)
LBXBCD		Blood Cadmium (ug/L)
LBXTHG		Blood mercury, total (ug/L)
LBXBSE		Blood selenium (ug/L)
LBXBMN		Blood manganese (ug/L)
LBXSCU		Serum Copper (ug/dL)
LBXSSE		Serum Selenium (ug/L)
LBXSZN		Serum Zinc (ug/dL)
URXUAS		Urinary arsenic, total (ug/L)
LBXHCY		Homocysteine (umol/L)
LBXCOT		Cotinine (ng/mL)
LBDVIDMS		Vitamin D (nmol/L)
LBXTR		Triglyceride (mg/dL)
LBDTRSI		Triglyceride (mmol/L)
LBDLDL		LDL-cholesterol (mg/dL)
LBDLDLSI		LDL-cholesterol (mmol/L)
LBXTC		Total cholesterol (mg/dL)
LBDTCSI		Total cholesterol (mmol/L)
LBDHDL		HDL-cholesterol (mg/dL)
LBDHDLSI		HDL-cholesterol (mmol/L)
LBXCRP		C-reactive protein(mg/dL)
LBXGLU		Fasting Glucose, plasma (mg/dL)
LBXGLUSI		Fasting Plasma glucose: SI(mmol/L)
LBXGH		Glycohemoglobin(%)
LBXTST		Testosterone total (ng/dL)
SSTESTO		Testostosterone (ng/mL)
SSSHBG		Sex Hormone Binding Globulin (nmol/L)
SSSE2		estradiol (pg/mL)
SS3adlG		androstanedione glucuronide (ng/mL)
WTSAF2YR		Fasting Subsample 2 Year MEC Weight
LBXHDT		Trans 9-hexadecenoic acid concentrt (uM)
LBXOD1		Trans 11-octadecenoic acid (uM)
LBXOD9		Trans 9-octadecenoic acid (uM)
LBXOTT		Trans 9, trans 12-octadienoic acid (uM)
SSMR1.N		Myristic acid (micromol/L)
SSML1.N		Myristoleic acid (micromol/L)
SSPM1.N		Palmitic acid (micromol/L)
SSPL1.N		Palmitoleic acid (micromol/L)
SSST1.N		Stearic acid (micromol/L)
SSOL1.N		Oleic acid (micromol/L)
SSVC1.N		cis-Vaccenic acid (micromol/L)
SSLNA.N		Linoleic acid (micromol/L)
SSGLA.N		gamma-Linolenic acid (micromol/L)
SSALN.N		alpha-Linolenic acid (micromol/L)
SSHGL.N		homo-gamma-Linolenic acid (micromol/L)
SSAR1.N		Arachidic acid (micromol/L)
SSEN1.N		Eicosenoic acid (micromol/L)
SSED1.N		Eicosadienoic acid (micromol/L)
SSARA.N		Arachidonic acid (micromol/L)
SSEPA.N		Eicosapentaenoic acid (micromol/L)
SSDA1.N		Docosanoic acid (micromol/L)
SSDE1.N		Docosenoic acid (micromol/L)
SSDTA.N		Docosatetraenoic acid (micromol/L)
SSDP6.N		Docosapentaenoic-6 acid (micromol/L)
SSDP3.N		Docosapentaenoic-3 acid (micromol/L)
SSDHA.N		Docosahexaenoic acid (micromol/L)
SSLG1.N		Lignoceric acid (micromol/L)
SSNR1.N		Nervonic acid (micromol/L)
LBXACR		Acrylamide (pmoL/G Hb)
LBXGLY		Glycidamide (pmoL/G Hb)
LBDACRLC		Acrylamide comment code
	0	At or above the detection limit
	1	Below lower detection limit
LBDGLYLC		Glycidamide comment code
	0	At or above the detection limit
	1	Below lower detection limit
TeloMean		Mean T/S ratio
URXUBA		Barium, urine (ng/mL)
URXUBE		Beryllium, urine (ng/mL)
URDUCD		Cadmium, urine (ng/mL)
URDUCDLC		Urinary cadmium comment code
	0	detectable result
	1	below detectable limit
URXUCO		Cobalt, urine (ng/mL)
URXUCS		Cesium, urine (ng/mL)
URXUMO		Molybdenum, urine (ng/mL)
URXUMN		Manganese, urine (ug/L)
URXUPB		Lead, urine (ng/mL)
URXUCD		Cadmium, urine (ug/L)
URXUPT		Platinum, urine (ng/mL)
URXUSB		Antimony, urine (ng/mL)
URXUTL		Thallium, urine (ng/mL)
URXUTU		Tungsten, urine (ng/mL)
URXUCR		Creatinine, urine (mg/dL)
URXUSN		Tin, urine (ug/L)
URXUSR		Strontium, urine (ug/L)
URXUUR		Uranium, urinary (ug/L)
WTSHM2YR		Heavy Metal Subsample 2 Year Mec Weight
WTSHM4YR		Heavy Metal Subsample 4 Year Mec Weight
URXP01		1-hydroxynaphthalene (ng/L)
URXP02		2-hydroxynaphthalene (ng/L)
URXP03		3-hydroxyfluorene (ng/L)
URXP04		2-hydroxyfluorene (ng/L)
URXP05		3-hydroxyphenanthrene (ng/L)
URXP06		1-hydroxyphenanthrene (ng/L)
URXP07		2-hydroxyphenanthrene (ng/L)
URXP10		1-hydroxypyrene (ng/L)
URXP17		9-hydroxyfluorene (ng/L)
URXP19		4-phenanthrene (ng/L)
URXUCR		Urinary creatinine
